# Supplementary material
Source: publisher figshare collection journal article supplement (https://geolsoc.figshare.com/articles/dataset/_/3453047)
Supplement: Supplementary file 2 [file 1]

J value: 0.016891 ± 0.000044

Integrated Age: 189.36 ± 1.57 Ma

Initial 40/36: 366.67 ± 35.21 (MSWD = 1.05, isochron between 0.50 and 2.00)

Correlation Age: 185.39 ± 0.99 Ma ( 95.3% of <sup>39</sup>Ar, steps marked by >) MSWD: 0.656

Plateau Age: 187.69 ± 0.73 Ma ( 82.2% of <sup>39</sup>Ar, steps marked by <) Mod. Err. 1.55

| Power   | <sup>36</sup> Ar/ <sup>40</sup> Ar | <sup>39</sup> Ar/ <sup>40</sup> Ar | r      | Ca/K   | % <sup>40</sup> Ar* | % <sup>39</sup> Ar | <sup>40</sup> Ar*/ <sup>39</sup> K | Age           |
|---------|------------------------------------|------------------------------------|--------|--------|---------------------|--------------------|------------------------------------|---------------|
| 1.90    | 0.003033 ± 0.000353                | 0.022929 ± 0.000742                | 0.008  | 12.829 | 89.56               | 0.30               | 4.52±4.56                          | 132.8 ± 129.2 |
| 2.40    | 0.002027±0.000171                  | 0.061206 ± 0.000699                | 0.011  | 12.358 | 59.79               | 2.04               | 6.55 0.83                          | 189.3 ± 22.8  |
| 2.80    | 0.001764 ± 0.000147                | 0.071438 ± 0.000849                | 0.007  | 9.833  | 52.00               | 2.33               | 6.70 0.62                          | 193.5 ± 16.9  |
| 3.20>   | 0.001381± 0.000125                 | 0.082460 ± 0.000845                | 0.009  | 7.376  | 40.71               | 3.05               | 7.18 0.46                          | 206.4 ± 12.4  |
| 3.60>   | 0.000748 ± 0.000139                | 0.108498 ± 0.001016                | 0.003  | 10.559 | 21.99               | 3.02               | 7.18 0.39                          | 206.6 ± 10.5  |
| 4.00>   | 0.000432±0.000081                  | 0.129322 ± 0.000948                | 0.002  | 16.896 | 12.62               | 7.05               | 6.75 0.19                          | 194.9 ± 5.3   |
| < 4.10> | 0.000730±0.000544                  | 0.115146 ± 0.002206                | -0.000 | 11.988 | 21.42               | 0.96               | 6.82 1.40                          | 196.6 ± 38.4  |
| < 4.40> | 0.000177 ± 0.000045                | 0.144837 ± 0.000723                | 0.002  | 20.133 | 5.08                | 14.74              | 6.55 0.10                          | 189.4 ± 2.7   |
| < 4.60> | 0.000130 ± 0.000044                | 0.147859 ± 0.000716                | 0.001  | 20.688 | 3.70                | 16.10              | 6.51 0.09                          | 188.3 ± 2.6   |
| < 4.80> | 0.000167 ± 0.000057                | 0.146047 ± 0.000721                | 0.000  | 21.054 | 4.78                | 13.68              | 6.52 0.12                          | 188.4 ± 3.3   |
| < 5.00> | 0.000352 ± 0.000136                | 0.140206 ± 0.001214                | 0.001  | 20.747 | 10.22               | 5.52               | 6.40 0.29                          | 185.2 ± 8.0   |
| < 5.30> | 0.000156 ± 0.000042                | 0.148001 ± 0.000658                | 0.002  | 21.489 | 4.48                | 17.92              | 6.45 0.09                          | 186.6 ± 2.5   |
| < 5.60> | 0.000221 ± 0.000062                | 0.145409 ± 0.000864                | 0.002  | 27.287 | 6.38                | 13.30              | 6.44 0.13                          | 186.2 ± 3.6   |

| Power   | <sup>40</sup> Ar | <sup>39</sup> Ar | <sup>38</sup> Ar | <sup>37</sup> Ar | <sup>36</sup> Ar | Blank <sup>40</sup> Ar | Atmos 40/36 |
|---------|------------------|------------------|------------------|------------------|------------------|------------------------|-------------|
| 1.90    | 44.865 ± 0.248   | 1.033 ± 0.033    | 0.082 ± 0.021    | 7.207±0.250      | 0.138 ± 0.016    | 6.669                  | 291.806     |
| 2.40    | 115.214 ± 0.380  | 7.072 ± 0.076    | 0.236 ± 0.027    | 47.532 ± 0.611   | 0.246 ± 0.020    | 6.736                  | 291.806     |
| 2.80    | 112.982 ± 0.308  | 8.084 ± 0.093    | 0.219 ± 0.023    | 43.274 ± 0.514   | 0.211 ± 0.017    | 6.754                  | 291.806     |
| 3.20>   | 128.601 ± 0.377  | 10.608 ± 0.103   | 0.378 ± 0.027    | 42.634 ± 0.526   | 0.189 ± 0.016    | 6.657                  | 291.806     |
| 3.60>   | 96.559 ± 0.329   | 10.485 ± 0.089   | 1.075 ± 0.042    | 60.248 ± 0.614   | 0.089 ± 0.013    | 6.674                  | 291.806     |
| 4.00>   | 188.944 ± 0.416  | 24.498 ± 0.169   | 4.679 ± 0.077    | 224.725 ± 1.534  | 0.144 ± 0.015    | 6.739                  | 291.806     |
| < 4.10> | 28.811 ± 0.245   | 3.321 ± 0.054    | 0.509 ± 0.033    | 21.657 ± 0.388   | 0.027 ± 0.016    | 6.756                  | 291.806     |
| < 4.40> | 352.195 ± 0.680  | 51.183 ± 0.232   | 10.713 ± 0.123   | 558.766 ± 3.333  | 0.218 ± 0.016    | 6.753                  | 291.806     |
| < 4.60> | 376.955 ± 0.622  | 55.931 ± 0.251   | 11.611 ± 0.124   | 627.304 ± 3.718  | 0.224 ± 0.017    | 6.660                  | 291.806     |
| < 4.80> | 324.018 ± 0.634  | 47.497 ± 0.211   | 9.714 ± 0.146    | 542.046 ± 3.272  | 0.205 ± 0.018    | 6.754                  | 291.806     |
| < 5.00> | 136.279 ± 0.428  | 19.179 ± 0.152   | 3.853 ± 0.072    | 215.708 ± 1.536  | 0.108 ± 0.018    | 6.790                  | 291.806     |
| < 5.30> | 418.918 ± 0.634  | 62.236 ± 0.256   | 12.370 ± 0.133   | 724.818 ± 4.254  | 0.268 ± 0.018    | 6.728                  | 291.806     |
| < 5.60> | 315.747 ± 0.626  | 46.193 ± 0.254   | 9.195 ± 0.110    | 681.605 ± 4.270  | 0.260 ± 0.019    | 7.036                  | 291.806     |

Table 1ap: <sup>40</sup>Ar/<sup>39</sup>Ar results of sample T0. First line: Can irradiation J value. Second line: total gas age (integrated age). Third through fifth line: correlation (multi-point isochron) and plateau ages, with corresponding volume of <sup>39</sup>Ar used in selected analysis steps. Remaining data table corresponds to Ar and K isotope measurements and age calculations for individual steps. %<sup>40</sup>Ar=x.x% of released gas composed of radiogenic <sup>40</sup>Ar, %<sup>39</sup>Ar=proportion total <sup>39</sup>Ar released, Atmos40/36=atmospheric <sup>40</sup>Ar/<sup>36</sup>Ar during course of experiment.

J = 0.00042668 ± 0.0000093  
 Integrated age: 179 ± 9 Ma  
 Initial 40/36: 292.00 ± 10 (MSWD = 1.1)  
 Correlation age (isochron age, steps B-O): 182 ± 10 Ma  
 Plateau age (steps C-O): 184 ± 5 Ma

| Step ID | Temperature | <sup>40</sup> Ar/ <sup>39</sup> Ar | <sup>37</sup> Ar/ <sup>39</sup> Ar | <sup>36</sup> Ar/ <sup>39</sup> Ar (x 10 <sup>-3</sup> ) | <sup>39</sup> ArK (x 10 <sup>-16</sup> mol) | K/Ca   | <sup>40</sup> Ar* (%) | <sup>39</sup> Ar (%) | Age (Ma) | ±1s (Ma) |
|---------|-------------|------------------------------------|------------------------------------|----------------------------------------------------------|---------------------------------------------|--------|-----------------------|----------------------|----------|----------|
| B       | 500         | 613                                | 17.17243                           | 1.643486                                                 | 0.03                                        | 0.0297 | 21.0                  | 3.5                  | 97.6     | 25.17    |
| C       | 600         | 351                                | 5.412219                           | 0.4308                                                   | 0.04                                        | 0.0943 | 63.9                  | 5.3                  | 165.6    | 15.56    |
| D       | 650         | 734                                | 5.949677                           | 17.255                                                   | 0.03                                        | 0.0858 | 30.6                  | 3.5                  | 165.5    | 24.90    |
| E       | 700         | 258                                | 3.608555                           | 0.1503                                                   | 0.02                                        | 0.1414 | 82.9                  | 2.8                  | 158.3    | 29.64    |
| F       | 750         | 221                                | 2.417764                           | 0.0002                                                   | 0.02                                        | 0.2110 | 100.1                 | 2.1                  | 163.2    | 39.54    |
| G       | 800         | 248                                | 5.190655                           | 0.0783                                                   | 0.01                                        | 0.0983 | 90.8                  | 1.5                  | 165.9    | 56.39    |
| H       | 850         | 329                                | 3.134982                           | 0.5478                                                   | 0.01                                        | 0.1627 | 50.8                  | 1.0                  | 124.4    | 88.37    |
| I       | 900         | 336                                | 4.233211                           | 0.3438                                                   | 0.01                                        | 0.1205 | 69.9                  | 1.5                  | 172.7    | 57.93    |
| J       | 950         | 295                                | 6.140134                           | 0.1631                                                   | 0.03                                        | 0.0831 | 83.8                  | 3.5                  | 181.4    | 24.65    |
| K       | 1000        | 269                                | 9.485056                           | 0.0562                                                   | 0.23                                        | 0.0538 | 94.1                  | 28.1                 | 185.9    | 3.29     |
| L       | 1050        | 1634.418                           | 9.22974                            | 47                                                       | 0.34                                        | 0.0553 | 15.7                  | 40.9                 | 188.3    | 16.25    |
| M       | 1100        | 594.9427                           | 9.015016                           | 12                                                       | 0.01                                        | 0.0566 | 40.3                  | 0.8                  | 176.6    | 240.55   |
| N       | 1150        | 260.1745                           | 8.747064                           | 0.1077                                                   | 0.02                                        | 0.0583 | 88.0                  | 2.3                  | 169.2    | 87.16    |
| O       | 1200        | 257.7023                           | 9.37519                            | 0.0890                                                   | 0.03                                        | 0.0544 | 90.1                  | 3.3                  | 171.5    | 62.07    |

**Table 2ap:** <sup>40</sup>Ar/<sup>39</sup>Ar results of sample T1-A. The first 5 lines are the same that Table 1. Explanation: Isotopic ratios corrected for blank, radioactive decay, mass discrimination, and interfering reactions. Individual analyses show analytical error only; plateau and total gas age errors include error in J and irradiation parameters (all at one sigma). n= number of heating steps. <sup>39</sup>Ar/K is the amount of <sup>39</sup>ArK (moles) released for each single analysis (heating step). K/Ca = molar ratio calculated from reactor produced <sup>39</sup>ArK and <sup>37</sup>ArCa.

J = 0.001536 ± 0.15%  
 Integrated age: 180.3 ± 0.7 Ma  
 Initial 40/36: 281 ± 29 (MSWD = 0.08)  
 Correlation age (isochron age, steps 15-17): 182.8 ± 2.5 Ma  
 Plateau age (steps 17 to 17): 181.6 ± 0.7 Ma

| step | T (C) | t (min.) | <sup>36</sup> Ar | <sup>37</sup> Ar | <sup>38</sup> Ar | <sup>39</sup> Ar | <sup>40</sup> Ar | %40Ar*     | % <sup>39</sup> Ar rlsd | Ca/K         | <sup>40</sup> Ar*/ <sup>39</sup> ArK | Age (My) |
|------|-------|----------|------------------|------------------|------------------|------------------|------------------|------------|-------------------------|--------------|--------------------------------------|----------|
| 1    | 850   | 12       | 2.221            | 2.630            | 0.626            | 9.639            | 1280.89          | 48.7617594 | 7.600                   | 1.6638293500 | 64.798                               | 171.177  |
| 2    | 940   | 12       | 0.142            | 1.062            | 0.102            | 1.713            | 161.551          | 74.0261589 | 1.3                     | 3.782858672  | 69.813                               | 183.773  |
| 3    | 980   | 12       | 0.082            | 1.035            | 0.102            | 1.129            | 98.746           | 75.4612845 | 0.9                     | 5.5966557274 | 66.001                               | 174.207  |
| 4    | 1000  | 12       | 0.071            | 1.093            | 0.099            | 0.931            | 86.127           | 75.6400432 | 0.700                   | 7.1705335063 | 69.975                               | 184.177  |
| 5    | 1020  | 12       | 0.079            | 2.496            | 0.165            | 1.357            | 116.634          | 79.9848243 | 1.1                     | 11.247611155 | 68.747                               | 181.102  |
| 6    | 1040  | 12       | 0.13             | 6.769            | 0.395            | 2.464            | 205.514          | 81.3078428 | 1.9                     | 16.826060503 | 67.816                               | 178.768  |
| 7    | 1060  | 12       | 0.378            | 41.322           | 2.223            | 11.366           | 892.547          | 87.4853649 | 8.9                     | 22.302907416 | 68.700                               | 180.986  |
| 8    | 1070  | 12       | 0.200            | 22.265           | 1.207            | 6.451            | 501.510          | 88.2155889 | 5.1                     | 21.166083162 | 68.580                               | 180.684  |
| 9    | 1080  | 12       | 0.146            | 15.192           | 0.793            | 4.557            | 353.139          | 87.7829976 | 3.6                     | 20.440404348 | 68.026                               | 179.296  |
| 10   | 1090  | 12       | 0.212            | 24.980           | 1.249            | 6.465            | 500.422          | 87.4813657 | 5.1                     | 23.713135341 | 67.715                               | 178.514  |
| 11   | 1100  | 12       | 0.239            | 31.276           | 1.488            | 7.851            | 608.601          | 88.3955991 | 6.2                     | 24.453687946 | 68.523                               | 180.542  |
| 12   | 1110  | 12       | 0.230            | 23.400           | 1.120            | 6.053            | 484.373          | 85.9684582 | 4.8                     | 23.725304119 | 68.794                               | 181.220  |
| 13   | 1120  | 12       | 0.137            | 11.937           | 0.601            | 3.344            | 267.454          | 84.8633784 | 2.6                     | 21.896039377 | 67.874                               | 178.913  |
| 14   | 1140  | 12       | 0.210            | 28.573           | 1.196            | 7.822            | 600.193          | 89.6608258 | 6.2                     | 22.409866921 | 68.798                               | 181.231  |
| 15   | 1170  | 12       | 0.583            | 96.619           | 4.771            | 24.144           | 1838.46          | 90.6293039 | 19                      | 24.565494072 | 69.010                               | 181.762  |
| 16   | 1220  | 12       | 0.747            | 114.844          | 5.680            | 27.600           | 2128.49          | 89.6293382 | 21.7                    | 25.550248764 | 69.121                               | 182.041  |
| 17   | 1400  | 12       | 0.266            | 17.156           | 0.859            | 4.152            | 363.018          | 78.3473547 | 3.3                     | 25.370676033 | 68.501                               | 180.485  |

| step | $^{36}\text{Ar}/^{40}\text{Ar}$ | $^{36}\text{Ar}/^{40}\text{Ar}$ err | $^{39}\text{Ar}/^{40}\text{Ar}$ | $^{39}\text{Ar}/^{40}\text{Ar}$ err | R <sup>2</sup> |
|------|---------------------------------|-------------------------------------|---------------------------------|-------------------------------------|----------------|
| 1    | 0.001733951                     | 0.455                               | 0.007525236                     | 0.459251316                         | 0.018          |
| 2    | 0.000878979                     | 3.419                               | 0.010603463                     | 0.446773943                         | 0.000          |
| 3    | 0.000830413                     | 3.723                               | 0.011433375                     | 0.435825072                         | 0.072          |
| 4    | 0.000824364                     | 15.901                              | 0.010809618                     | 0.515224314                         | 0.001          |
| 5    | 0.000677333                     | 4.125                               | 0.011634686                     | 0.443608952                         | 0.109          |
| 6    | 0.00063256                      | 1.362                               | 0.011989451                     | 0.474474451                         | 0.001          |
| 7    | 0.000423507                     | 0.629                               | 0.012734343                     | 0.431206385                         | 0.091          |
| 8    | 0.000398796                     | 0.688                               | 0.012863153                     | 0.494623715                         | 0.279          |
| 9    | 0.000413435                     | 1.179                               | 0.012904267                     | 0.623402601                         | 0.184          |
| 10   | 0.000423642                     | 0.867                               | 0.012919096                     | 0.568989257                         | 0.269          |
| 11   | 0.000392704                     | 0.645                               | 0.012900077                     | 0.454426808                         | 0.717          |
| 12   | 0.000474841                     | 0.850                               | 0.012496568                     | 0.455930496                         | 0.196          |
| 13   | 0.000512238                     | 2.975                               | 0.012503085                     | 0.531943743                         | 0.144          |
| 14   | 0.000349887                     | 1.393                               | 0.013032475                     | 0.453879701                         | 0.193          |
| 15   | 0.000317113                     | 0.655                               | 0.013132731                     | 0.431047788                         | 0.000          |
| 16   | 0.000350953                     | 0.556                               | 0.012966939                     | 0.435832591                         | 0.129          |
| 17   | 0.000732746                     | 1.843                               | 0.011437449                     | 0.584529052                         | 0.042          |

**Table 3ap:**  $^{40}\text{Ar}/^{39}\text{Ar}$  results of sample T1-N. The first 5 lines are the same that Table 1. Explanation: isotope beams in mV, rlsd = released, error in age includes J error, all errors 1 sigma ( $^{36}\text{Ar}$  through  $^{40}\text{Ar}$  are measured beam intensities, corrected for decay for the age calculations). 4 amu discrimination =  $1.0565 \pm 0.43\%$ ,  $^{40}/^{39}\text{K} = 0.01738 \pm 67.07\%$ ,  $^{36}/^{37}\text{Ca} = 0.0002157 \pm 8.78\%$ ,  $^{39}/^{37}\text{Ca} = 0.0006702 \pm 1.60\%$
