# Supplementary material
Source: publisher figshare collection journal article supplement (https://geolsoc.figshare.com/articles/dataset/_/3453047)

Site Jz4 (andesite) - Sample JZ4-4

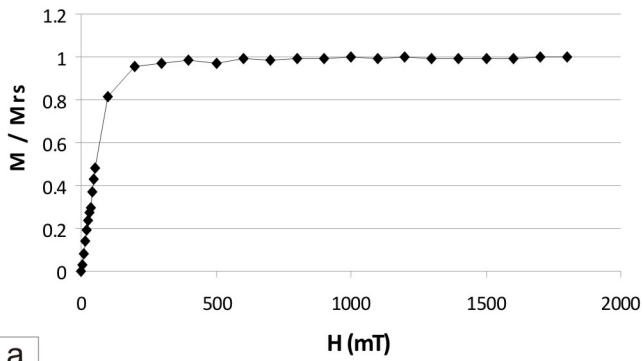

Site Jz5 (andesite) - Sample JZ5-5

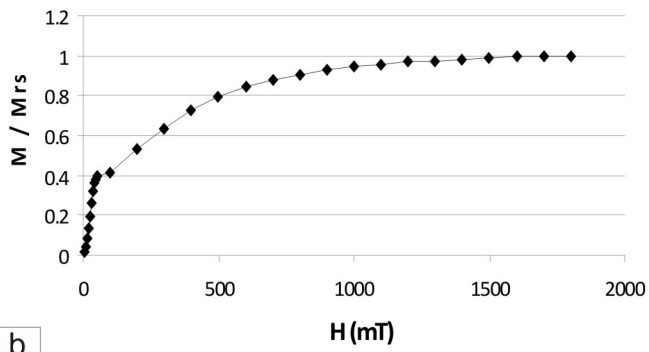

Site Jz16t (tuff) - Sample JZ16-6

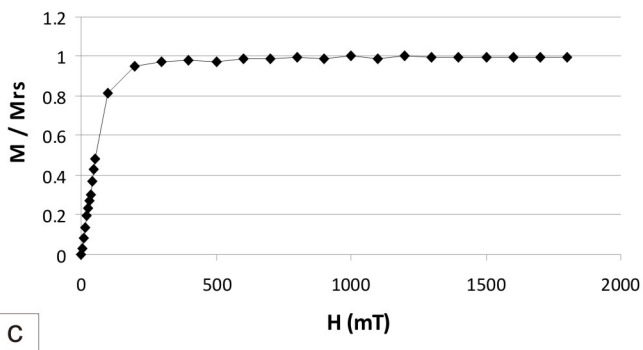

Site JZ16 (andesite) - Sample JZ16-14

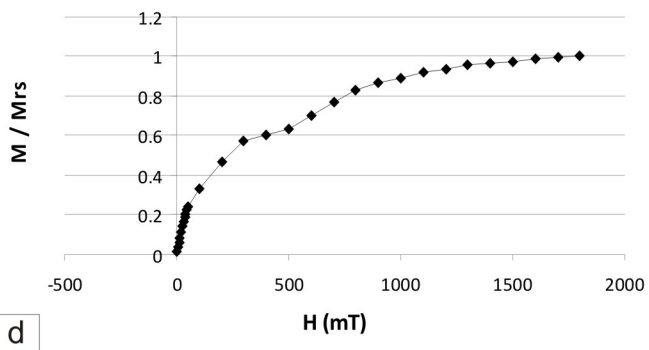

Site T2 (pelites) - Sample T2-1

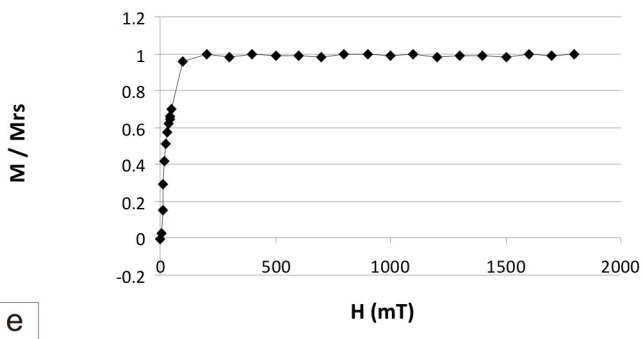

Site T5 (rhyolite) - Sample T5-6

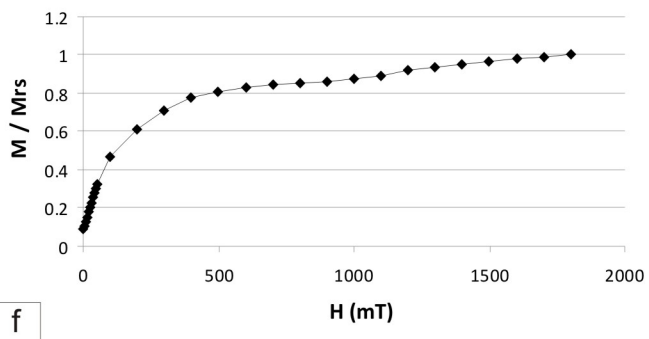

Site T7 (ignimbrite) - Sample T7-3

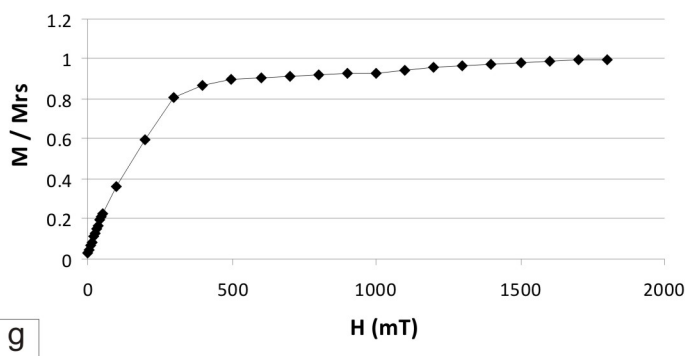

Supplement: Supplementary file 3 [file 1]
